# Supplementary material for: Influence of moisture on the preparation, crystal structure, and photophysical properties of organohalide perovskites
Source: Royal Society of Chemistry journal article supplement (doi:10.1039/c4cc05231e), 2014-01-01
Supplement: c4cc05231e1.pdf [file c4cc05231e1.pdf]

# Influence of Moisture on the Preparation, Crystal Structure, and Photophysical Properties of Organohalide Perovskites<sup>†</sup>

Kelsey K. Bass,<sup>a</sup> R. Eric McAnally,<sup>a</sup> Shiliang Zhou,<sup>a</sup> Peter I. Djurovich,<sup>a</sup> Mark E. Thompson,<sup>a</sup> Brent C. Melot<sup>a\*</sup>

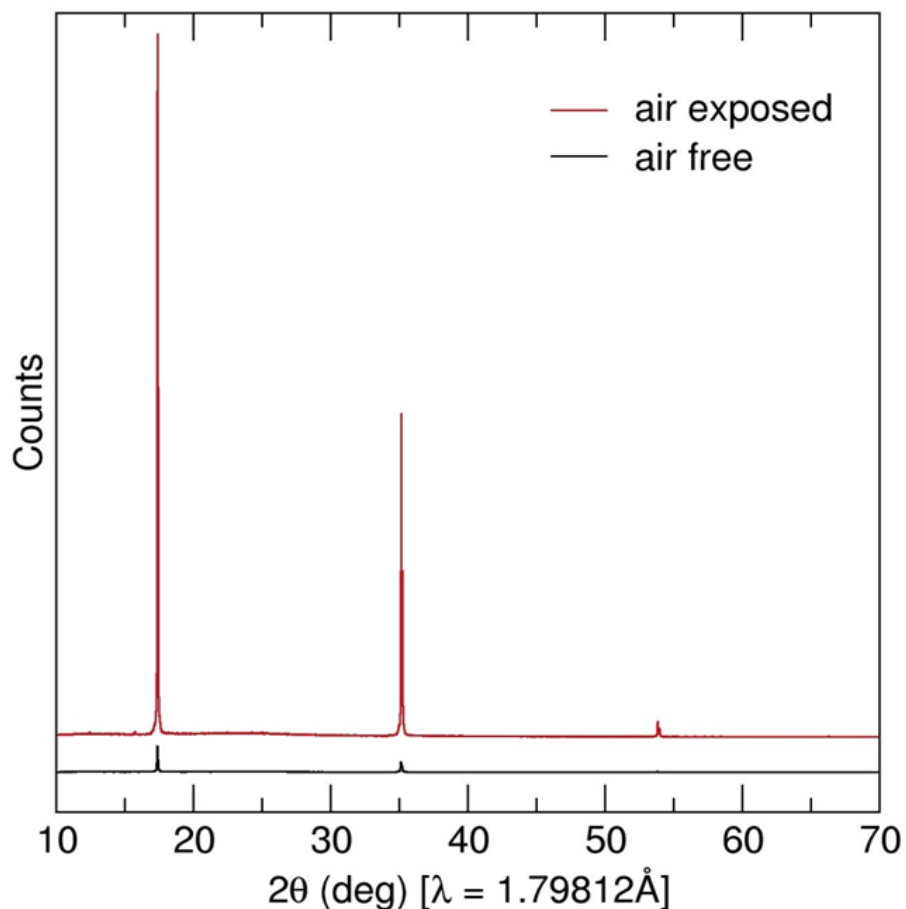

**Fig. 1** Comparison of laboratory powder diffraction data for air free and air exposed  $\text{CH}_3\text{NH}_3\text{PbBr}_3$  prepared/characterized under inert atmosphere (black line) and exposed to ambient atmosphere (red line).

<sup>a</sup> Department of Chemistry, University of Southern California, Los Angeles, CA 90089 E-mail: [melot@usc.edu](mailto:melot@usc.edu)

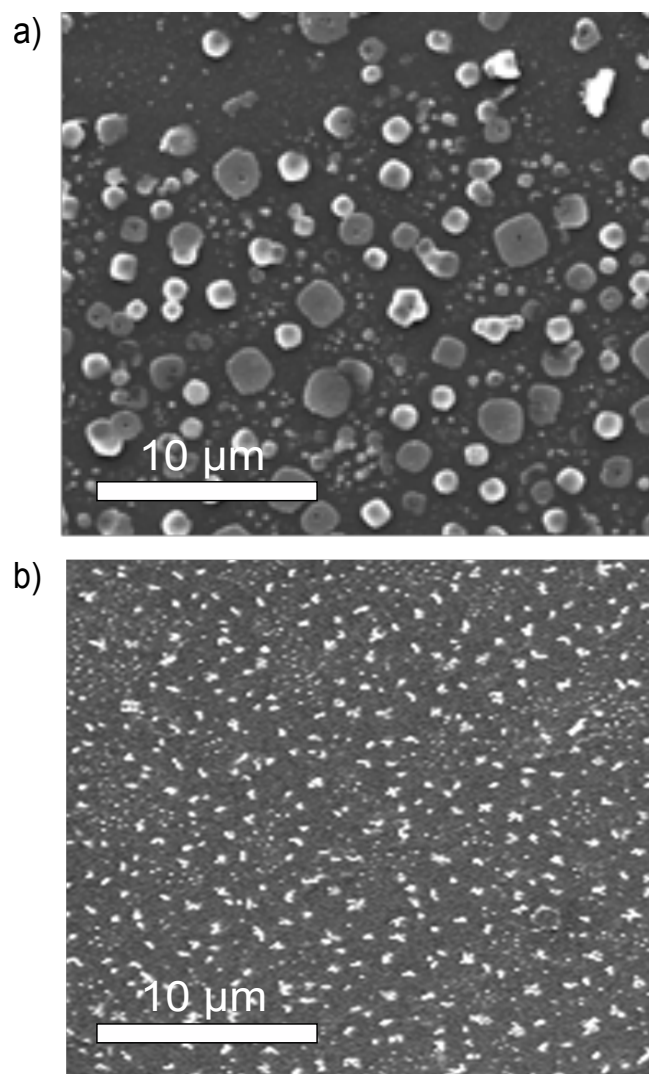

**Fig. 2** Scanning electron microscope images for 10 wt %  $\text{CH}_3\text{NH}_3\text{PbBr}_3$  in DMF films spin-cast under (a) inert atmosphere and (b) in ambient atmosphere.
